# Supplementary material
Source: publisher site journal article supplement (https://www.dovepress.com/article/340562)
Supplement: Supplementary file 1 [file get_supplementary_file.php]

**Asthma control in patients with severe eosinophilic asthma treated with reslizumab: Spanish real-life data.**

**Appendix**

Reslizumab real-life Spanish Group: Maite Audicana Berasategui, Jesús Jiménez, Javier Callejas, Cleofe Fernández Aracil, Justo Grau Delgado, Alicia Habernau, Cristian Domingo, Ana Sogo, Dani Montserrate, Ebymar Arismendi, Irina Bobolea, Antonio Valero, Carlos Martínez, María Basagaña, Nacho García-Olive, Vicente Plaza, Alfons Torrego, David Muñoz, Mariana Muñoz, Ana Pueyo, Francisco Pérez Grimaldi, Agustín Sojo, Beatriz Abascal, Pepa Bueso, Anna Torrents, Leopoldo Domínguez Pérez, Luis Manuel Entrenas, Marina Blanco Aparicio, Javier Domínguez Ortega, Juan Fernández Lahera, Elena Villamañán, Santiago Quirce, Belén Arnalich Jiménez, Eva de Santiago, Luis Puente, Ana Rosado, Alberto Levy, Mª Jesús Avilés Inglés, Pilar Cebollero Rivas, Coral González, Raquel Ruiz Ferreras, Mar Mosteiro Añón, Zulay Almeida Sánchez, Raquel Rodríguez, Sergio Fumero, Hemily Izaguirre, Mª José Espinosa, Perla Valenzuela, Eva Martínez Moragón, Carmen Pérez Francés, Fernando Sánchez Toril, Aizea Mardones Charroalde, Silvia Pascual, Elisabet Vera Solana, José Ángel Carretero, Javier González Barcala.
